1 **High-risk human papillomavirus in oral cavity squamous cell carcinoma**

2

3 Vinayak Palve<sup>1</sup>, Jamir Bagwan<sup>1</sup>, Neeraja M Krishnan<sup>1</sup>, Manisha Pareek<sup>1</sup>, Udit Chandola<sup>1</sup>, Amritha  
4 Suresh<sup>2</sup>, Gangotri Siddappa<sup>2</sup>, Bonney L James<sup>2</sup>, Vikram Kekatpure<sup>3</sup>, Moni Abraham Kuriakose<sup>2,3</sup>  
5 and Binay Panda<sup>1\*</sup>

6

7 <sup>1</sup>Ganit Labs, Bio-IT Centre, Institute of Bioinformatics and Applied Biotechnology, Bangalore,  
8 India

9 <sup>2</sup>Mazumdar Shaw Centre for Translational Cancer Research, Bangalore, India

10 <sup>3</sup>Mazumdar Shaw Medical Centre, Bangalore, India

11

12 \*corresponding author: Binay Panda, Ganit Labs, Bio-IT Centre, Institute of Bioinformatics and  
13 Applied Biotechnology, Bangalore, India, Telephone: +91-9663311188, Email: [binay@ganitlabs.in](mailto:binay@ganitlabs.in)

14

15 Research support: Department of Electronics and Information Technology, Government of India  
16 (Ref No: 18(4)/2010-E-Infra., 31-03-2010) and Department of IT, BT and ST, Government of  
17 Karnataka, India (Ref No: 3451-00-090-2-22).

18

19 Running Head: HPV in oral cavity tumors.

20

21 **ABSTRACT**

22 *Purpose:* The prevalence of human papillomavirus (HPV) in oral cavity squamous cell carcinoma  
23 (OSCC) varies significantly based on assay sensitivity and patient geography. Accurate detection is  
24 essential to understand the role of HPV in disease prognosis and management of patients with  
25 OSCC.

26 *Methods:* We generated and integrated data from multiple analytes (HPV DNA, HPV RNA, and  
27 p16), assays (immunohistochemistry, PCR, qPCR and digital PCR) and molecular changes (somatic  
28 mutations and DNA methylation) from 153 OSCC patients to correlate p16 expression, HPV DNA,  
29 and HPV RNA with HPV incidence and patient survival.

30 *Results:* High prevalence (33-58%) of HPV16/18 DNA did not correlate with the presence of  
31 transcriptionally active viral genomes (15%) in tumors. Eighteen percent of the tumors were p16  
32 positive, and only 6% were both HPV DNA and RNA positive. Most tumors with relatively high-  
33 copy HPV DNA, and/or HPV RNA, but not with HPV DNA alone (irrespective of copy number),  
34 were wild-type for *TP53* and *CASP8* genes. In our study, p16 protein, HPV DNA and HPV RNA,  
35 either alone or in combinations, did not correlate with patient survival. Nine HPV-associated genes  
36 stratified the virus +ve from the -ve tumor group with high confidence ( $p < 0.008$ ) when HPV DNA  
37 copy number and/or HPV RNA were considered to define HPV positivity and not HPV DNA alone  
38 irrespective of their copy number ( $p < 0.2$ ).

39 *Conclusions:* In OSCC, the presence of both HPV RNA and p16 are rare. HPV DNA alone is not an  
40 accurate measure of HPV positivity and therefore not informative. Moreover, HPV DNA, RNA or  
41 p16 don't correlate with outcome.

42

43 *Keywords:* Human papillomavirus (HPV), HPV DNA, HPV RNA, oral cavity tumors, copy  
44 number, survival, somatic mutation, DNA methylation

45

46

47

48

## 49 INTRODUCTION

50 Head and neck squamous cell carcinoma (HNSCC) is the sixth most common cancer worldwide  
51 with an incidence of 550,000 cases annually<sup>1</sup>. Oral cavity squamous cell carcinoma (OSCC)  
52 constitute a majority of HNSCC including tumors of the oral/anterior tongue and buccal mucosa<sup>2</sup>.  
53 The major known risk factors of OSCC are tobacco products, alcohol, and infection with human  
54 papillomavirus (HPV)<sup>3</sup>. Unlike oropharyngeal tumors, where HPV incidence with HPV DNA,  
55 RNA, and HPV-proteins is reported to be very high, (up to 90%)<sup>4,5</sup>, the prevalence of HPV in  
56 OSCC varies widely (from none to 74%) depending on the choice of analyte, detection  
57 methodology and the geography of the patient cohort<sup>6</sup>. Additionally, unlike oropharyngeal tumors<sup>7-</sup>  
58 <sup>11</sup>, the role of HPV in disease prognosis and response to therapy in patients with OSCC is equivocal.  
59 Despite the fact that HPV RNA is shown to function as better screening and patient management  
60 tool<sup>12</sup>, the presence of HPV DNA is routinely used as a measure of HPV infection in tumors.  
61 However, there is a considerable variation in the sensitivity of DNA-based assays. Although widely  
62 used, HPV DNA results does not always match with HPV RNA, especially in OSCC. Therefore, in  
63 tumors, presence of HPV E6/E7 RNA and/or their protein products are considered as gold standard  
64 tests defining HPV positivity.

65 HPV16 and HPV18 subtypes have been epidemiologically linked with head and neck  
66 carcinoma<sup>13</sup>. High-risk HPV16 and HPV18 are the most predominant subtypes in oral cavity  
67 tumors of Indian patients while the other subtypes (HPV33, HPV6, and HPV11) are rare<sup>14,15</sup>. HPV  
68 E6 interacts with p53 to promote its degradation via ubiquitin pathway while E7 forms a complex  
69 with Rb leading to its functional inactivation and dysregulation of the cell cycle<sup>16</sup>. In some HPV-  
70 related tumors, E6- and E7-mediated inactivation of p53 and Rb result in the accumulation of p16  
71 protein<sup>17</sup> while in others p16 expression does not directly correlate with HPV positivity<sup>18</sup>. Large-  
72 scale sequencing studies have demonstrated that the majority of HPV-negative tumors harbor  
73 mutations in *TP53* and *CASP8* and a significant proportion of HPV-positive tumors in *PIK3CA*<sup>19-21</sup>.  
74 Additionally, past studies have identified specific mutations in potential drug targets like *FGFR2/3*  
75 and lack of *EGFR* aberrations in HPV-positive patients<sup>21</sup> and the role of *CASP8* in HPV-negative  
76 cell line and patients<sup>19,22</sup>. Despite the wealth of information, accuracy of different HPV tests and

77 whether HPV plays an important factor in oral cavity tumor stratification and treatment remain to  
78 be answered.

79 In the present study, we addressed the following questions on HPV in a cohort of 153 patients  
80 with oral cavity tumors. Does sensitivity matter in the detection of HPV DNA in tumors? Does the  
81 presence of tumor p16 and HPV DNA correlate with HPV E6/E7 RNA? Does the presence of high-  
82 copy HPV DNA accurately reflect HPV positivity? Are p16 protein, HPV DNA, HPV E6/E7 RNA,  
83 individually or together, linked with patient survival? And finally, do somatic mutations and DNA  
84 methylation at 5-Cytosine residues distinguish the HPV +ve from the HPV -ve tumors?

85

## 86 METHODS

### 87 *Patient cohort*

88 Tumor samples from patients with OSCC (Buccal mucosa, BM, including from upper and  
89 lower gingivobuccal sulcus and retromolar trigone and Oral tongue, OT) were accumulated  
90 consecutively. Informed consent was obtained voluntarily from each patient enrolled in the study  
91 and ethical was obtained from the Institutional Ethics Committees. All the tissues were frozen  
92 immediately in liquid nitrogen and stored at  $-80^{\circ}\text{C}$  until further use. Only those tumors with  
93 squamous cell carcinoma and at least 70% tumor cells and confirmed diagnosis were included in the  
94 current study. Patients ( $n = 153$ ) underwent staging according to AJCC criteria, and curative intent  
95 treatment as per NCCN guidelines involving surgery with or without postoperative adjuvant  
96 radiation or chemo-radiation at the Mazumdar Shaw Medical Centre were accrued for the study  
97 (Table 1). Patients who received prior investigational therapy, CT, surgery or RT within four weeks  
98 of initiating the investigation were excluded from the current study. Post-treatment surveillance was  
99 carried out by clinical and radiographic examinations as per the NCCN guidelines.

100

### 101 *Cell cultures*

102 Cell lines (UM-SCC47, from Dr. Thomas Carey, University of Michigan, USA <sup>23</sup>; Hep2,  
103 National Centre for Cell Science, Pune, India; UPCI:SCC29B and UPCI:SCC040, from Dr.  
104 Susanne Gollin, University of Pittsburg, USA <sup>24</sup>) were maintained in Dulbecco's Modified Eagles'

105 Media (DMEM) supplemented with 10% FBS, 1X MEM non-essential amino acids solution and 1X  
106 penicillin/streptomycin mixture (Gibco) and grown in incubators at 37<sup>0</sup>C with 5% CO<sub>2</sub>.

107

### 108 *Immunohistochemistry (IHC)*

109 For p16 immunohistochemistry (IHC) staining was carried out using FFPE tissue blocks and  
110 with primary antibody from BioGenex, USA (cat: AM540-5M; Anti-p16(INK4), Clone G175-405  
111 in the NordiQC list) and using the poly-HRP detection system (Cat: QD400-60KE, BioGenex,  
112 Fremont, CA, USA) following manufacturers' instructions. Sections of cervical cancer were used as  
113 the positive control. The presence of p16 protein was scored based on the proportion of  
114 immunopositive cells with both cytoplasmic and nuclear staining, irrespective of staining intensity  
115 (weak/moderate/strong). The scoring pattern was: 0 - no immunopositive cells, 1 - <10%  
116 immunopositive cells; 2 - 10-40% immunopositive cells and 3 - >40% immunopositive cells.  
117 Tumors with a score of 3 were considered to be p16 positive.

118

### 119 *DNA extraction*

120 The genomic DNA from tumor tissues and cell lines were extracted using DNeasy Blood and  
121 Tissue extraction kit using the spin column method with an intermediate RNase digestion following  
122 manufacturer's instructions (Qiagen, USA). The DNA was quantified using Qubit 2.0 fluorometer  
123 (Invitrogen, USA). Total 300ng of genomic DNA (unless specified otherwise) from tumors was  
124 used for the detection of HPV using PCR, qPCR, and digital droplet PCR (ddPCR) methods.

125

### 126 *Detection of HPV DNA with PCR*

127 We tested five sets of primers published in the literature and two newly designed ones in the  
128 amplification reactions (Figure 1). PCR primers were either consensus or type-specific regions of  
129 the virus (Figure 1). Five sets of primers, including 4 HPV consensus (GP5-6; CP-I/II; MY09/11  
130 and PGMY09/11) and one type-specific (HPV16-L1) primers as described in the literature<sup>25</sup>, in the  
131 PCR assays. Additionally, we designed two sets of new type-specific primers (HPV16-E6 and  
132 HPV18-L1) to detect HPV DNA. We used genomic DNA from UMSCC-47 and Hep2 cell lines to

133 detect HPV16 and HPV18 respectively at various dilutions to determine relative efficiency,  
134 sensitivity, and accuracy of amplification (Figure 2B). The primer sequences and the amplification  
135 conditions used are provided in Supplementary Table 1.

136

#### 137 *Detection of HPV DNA with qPCR*

138 For qPCR, E6 and E7 regions from HPV16 and HPV18 respectively were cloned in pUC19  
139 vector, and Sanger sequencing confirmed their sequences. The qPCR was carried out using KAPA  
140 Probe Fast qPCR master mix Universal (2X) (cat: KK4701, KAPA Biosystems, USA). The primers  
141 and probes were designed (Supplementary Table 1) within the cloned regions of the HPV16, and  
142 HPV18 plasmids and standard quantitative PCR was performed. The standard curves were  
143 generated using serial dilutions (from 10 to 100,000 copies) of HPV16, and HPV18 cloned pUC19  
144 plasmids. Genomic DNA from positive and negative control cell lines was used as positive and  
145 negative controls for HPV18 and HPV16 respectively (Supplementary Figure 1). All amplification  
146 reactions were carried out in triplicates, using nuclease-free water (cat: AM9932, Ambion, USA) as  
147 a negative control. The analysis for each sample was performed by using the absolute quantification  
148 using standard curve generated with serial dilutions of cloned plasmids. Tumors and cell lines  
149 samples were counted as positive for those having Ct values three times away from the standard  
150 deviation from the mean of negative controls.

151

#### 152 *Detection of HPV DNA using droplet digital PCR (ddPCR)*

153 Digital PCR was performed using the QX100 ddPCR system (Bio-Rad, USA) using primers  
154 and probes as provided in Supplementary Table 1. The reaction mix consisted of 10  $\mu$ l of 2 $\times$  ddPCR  
155 Supermix without dUTP (cat: 1863024; Bio-Rad, USA), 450 nM of both forward and reverse  
156 primers of HPV16 and 250 nM probe and 300ng of genomic DNA in a final volume of 20  $\mu$ l. The  
157 droplets were generated following manufacturer's standard instructions and were measured and  
158 normalized in every reaction using the Quanta soft V.6 software (Bio-Rad, USA). All the samples  
159 were processed in triplicates. Tumors and cell lines samples were counted as positive for those

160 having droplet numbers three times away from the standard deviation from the mean of negative  
161 controls.

162

### 163 *HPV DNA copy number*

164 We deduced the HPV absolute copy number from the qPCR standard curves using cloned  
165 HPV16/18 (Figure 3A). We considered a tumor or cell line to have relatively high-copy of HPV  
166 DNA when the copy number for HPV16 and HPV18 DNA were more than  $3.3 \times 10^2$  and  $3.3 \times 10^3$   
167 per microgram of tumor DNA respectively. To minimize the effect of tumor cellularity, ploidy, and  
168 heterogeneity, we expressed the HPV copy number as copies per microgram of tumor DNA used in  
169 the reaction.

170

### 171 *Detection of HPV16/18 E6/ E7 RNA*

172 The total RNA was extracted from 25mg of tumor tissues using the RNeasy mini kit from  
173 Qiagen (cat: 74104) following manufacturer's instructions. The residual DNA was digested on the  
174 column during extraction using RNase free DNase set from Qiagen (cat: 79254). RNA (500ng) was  
175 subjected to cDNA synthesis using Takara's Prime Script first strand cDNA synthesis kit (cat:  
176 6110A). The qPCR was carried out using KAPA SYBR Fast qPCR master mix Universal (cat:  
177 KK4601, KAPA Biosystems, USA) with GAPDH as an internal control. The primer sequences and  
178 the amplification conditions are provided in Supplementary Table 1. All amplification reactions  
179 were carried out in triplicates, using nuclease-free water (cat: AM9932, Ambion, USA) as no  
180 template control, cDNA from UPCI:SCC29B and UPCI:SCC40 cell lines as negative controls and  
181 cDNA from cell lines UM-SCC47 and Hep2 as positive controls for E6 and E7 amplifications  
182 respectively. Data were normalized using relative quantification method ( $2^{-\Delta\Delta Ct}$ )<sup>26</sup>. Positive tumors  
183 were counted as ones that have Ct values three times from the standard deviation of the mean of  
184 negative control.

185

### 186 *Mutation analysis by Sanger sequencing*

187 The mutation data on tumors for *TP53*, *CASP8*, and *RASAI* were retrieved from the  
188 previously published data <sup>22</sup>.

189

### 190 *Statistical Analysis*

191 The Chi-square test was used to the significance of different clinical parameters of patients.  
192 The relationship between tumor HPV status and survival in patients was examined by Kaplan-Meier  
193 analysis with overall survival (OS) and disease-free survival (DFS) with log-rank test for  
194 determining significance ( $p$  values  $<0.05$ ) Disease-free survival was calculated as the time between  
195 surgery and relapse/recurrence (as an event) of the disease or the last follow update in the case there  
196 is no recurrence. The median follow up time of the patients is 15 months. The KM curves were  
197 plotted using Graphpad Prism 5.0 software.

198

### 199 *Whole genome methylation and statistical data analyses*

200 Production of whole genome methylation data using Illumina Infinium Methylation450  
201 BeadChip, chip scanning and the data pre-processing are described previously <sup>27</sup>. Three tumors in  
202 HPV +ve group (relatively with high-copy HPV DNA and/or E6/E7 RNA) and 18 tumors in HPV -  
203 ve group (HPV DNA -ve and HPV RNA -ve) were considered for further analysis. Differential  
204 methylation for probes was estimated as  $\Delta\beta$  values (Tumor $\beta$  - Normal $\beta$ ) resulting in values ranging  
205 from -1 (hypo-methylation) to 1 (hypermethylation). Using a supervised clustering approach,  
206 differentially methylated probes that discriminated HPV +ve and HPV -ve patient's samples were  
207 identified. Hyper-methylated probes in the HPV +ve group that were hypo-methylated in the HPV -  
208 ve group, and *vice versa*, along with other probes with  $\Delta\beta$  values that differed by at least 0.5  
209 between the two groups, with a sample frequency of at least 60% were considered further. Finally,  
210 the list of genes consisting of average  $\Delta\beta$  values across tumors for multiple probes (where present)  
211 was drawn. Neighbourhood interaction network for these genes was inferred using PCViz from  
212 PathwayCommons (<http://www.pathwaycommons.org/pcviz/#neighborhood/>). The genes and their  
213 interacting partners were mapped to the Viral Carcinogenesis pathway from KEGG (hsa05203), and  
214 mapped genes were linked back to respective genes found using supervised clustering. For the



215 linked genes, an unpaired t-test was performed to determine the significance of the difference  
216 between the HPV +ve and HPV -ve tumor groups. The same was performed for the HPV-associated  
217 genes between the DNA-based (irrespective of the DNA copy number) HPV +ve and HPV -ve  
218 tumor groups.

219

## 220 RESULTS

### 221 *p16 expression*

222 For the p16 immunohistochemical study, the tumors ( $n = 55$ ) were first confirmed by H and E  
223 staining of the paraffin tissue sections followed by the immunohistochemical staining with the  
224 surrogate marker p16. Figure 2A shows the representative p16 +ve and -ve staining in oral cavity  
225 tumor sections (OSCC) along with the cervical tissue section (+ve control). As indicated  
226 previously, we considered cells with cytoplasmic + nuclear staining for p16 to be counted as overall  
227 p16 positive. In our study, 18% of the tumors were p16 positive (Table 2).

228

### 229 *Incidence of HPV DNA*

#### 230 *Detection of HPV using PCR:*

231 The efficacy of HPV16/18 DNA detection using various consensus or type-specific primers is  
232 shown in Figure 2B. The primers described in the literature (GP5+6+, MY09/11, CPI-II or  
233 PGMY09/11, HPV16L1) could only detect HPV DNA when 0.03ng or higher amount of genomic  
234 DNA from the cell line UMSCC-47/Hep2 was used (Figure 2B). However, the newly designed  
235 type-specific primers (HPV16E6 and HPV18L1) were able to detect HPV DNA with as low as  
236 0.0003ng and 0.003ng genomic DNA for HPV16 and HPV18 respectively (Figure 2B). To check  
237 the efficiency of the newly designed primers with absolute copy numbers of HPV genome, we used  
238 serial diluted HPV cloned plasmids DNA. As shown in Supplementary Figure 2, efficient  
239 amplification with 100 copies of HPV genome or higher could be detected. Once we optimized the  
240 conditions and primers for all the amplification reactions, we performed PCR in oral cavity tumors  
241 ( $n = 70$ ). In our cohort, 58% (41/70) of the tumors were HPV DNA +ve for any of the PCR (Table  
242 2, Supplementary Figure 3). Figure 2C shows the efficiency of the consensus and type-specific

243 primers in a set of representative oral cavity tumors. Widely used primers from the literature  
244 (MY09/11, PGMY09/11, GP5+6+ and HPV16L1) yielded either least or moderate (CPI-II)  
245 sensitivity of detection while the newly designed HPV16E6 and HPV18L1 primers showed the  
246 optimum sensitivity of detection (Figure 2B). We observed inhibition of amplification reactions at a  
247 high concentration of tumor genomic DNA with positive cell line spike-in experiment  
248 (Supplementary Figure 4) and therefore avoided in the reactions. Additionally, an increase in  
249 amplification cycles also did not aid in the detection of HPV DNA in PCR as shown in  
250 Supplementary Figure 5.

251

#### 252 *Detection of HPV using real-time PCR:*

253 Next, we used quantitative PCR using Taqman chemistry to detect HPV DNA. We performed  
254 serial dilution using HPV16 E6, and HPV18 L1 cloned plasmids to obtain standard curves (Figure 3  
255 I, IV). We used an increasing amount of genomic DNA from negative control cell lines to  
256 demonstrate specific amplification of HPV DNA (Supplementary Figure 1). Genomic DNA from  
257 HPV +ve and -ve cell lines were used to plot the baseline. The real-time PCR was performed on  
258 tumors of the oral cavity ( $n=106$ ) and were counted as HPV DNA positive for those having Ct  
259 values three times away from the standard deviation from the mean of negative controls (Figure 3  
260 II, V). Results from qPCR indicated that 33% (35/106) of tumors were positive for HPV DNA  
261 (Table 2). Although we found high incidence for HPV16 (30%; 32/106) than HPV18 (18%; 19/106)  
262 type, the HPV18 positive tumors had very high copy numbers of viral DNA as reflected in their Ct  
263 values (Figure 3A III, VI). The prevalence of HPV DNA in oral tongue tumors was higher (44%)  
264 compared to that of buccal mucosa (4%).

265

#### 266 *Detection of HPV using droplet digital PCR:*

267 Finally, we used one of the most sensitive methods, digital PCR, to detect HPV DNA. Digital  
268 PCR was recently shown to successfully to detect HPV DNA in oropharyngeal tumors in highly  
269 specific manner<sup>30</sup>. We performed droplet digital PCR (ddPCR) with serially diluted plasmid  
270 HPV16E6 clones to generate the standard curve (Figure 3B, I). The genomic DNA from positive-

271 (UM-SCC47) and negative control cell lines (Hep2) for HPV16 along with a no template control  
272 (NTC) were used to plot the baseline (Figure 3B, II; Supplementary Figure 6). The digital PCR  
273 performed on the oral cavity tumors results indicated that 43% (59/136) of oral cavity tumors were  
274 positive for HPV16 DNA (Figure 3B, III and Table 2). Moreover, HPV16 infection was more  
275 prevalent in the oral tongue tumors (55%) compared to the buccal mucosal ones (17%) (Table 2).

276

### 277 *HPV E6 and E7 RNA expression*

278 The viral mRNA, E6, and E7 (for both HPV16 and HPV18) were measured by qPCR in oral  
279 cavity tumors and from cell lines (UMSCC-47 and Hep2). Compared to the cell lines, tumors  
280 showed very low levels of expression of E6 and E7 mRNA (Figure 3C). Unlike HPV DNA, only  
281 15% of the tumors showed expression of E6 and/or E7 RNA and 6% of the tumors confirmed the  
282 presence of both HPV DNA (with all the three assays) and transcriptionally active HPV genomes  
283 (Table 2). Similar to DNA, oral tongue tumors had a higher number (17%) of HPV E6/E7 RNA  
284 compared to the buccal mucosa (9%, Table 2). In our cohort, younger patients ( $\leq 40$  yrs age) were  
285 significantly more HPV RNA +ve than the older patients when analyzed by Chi-square analysis ( $p$   
286 = 0.029). When combining the results from all the assays (p16 IHC, HPV DNA, and HPV RNA),  
287 we found 6-48% of the tumors were positive in various assay combinations with PCR (Table 2).  
288 We found that 22% (23/106) of the tumors had relatively high-copy of HPV DNA and/or HPV  
289 E6/E7 mRNA.

290

### 291 *Linking tumor attributes, somatic mutations, and HPV with survival*

292 We performed Kaplan Meir survival analysis with various tumor attributes that revealed  
293 significant association between tumor differentiation ( $p=0.03$ ) and clinical stage ( $p=0.0003$ ) with  
294 overall survival (Figure 4A). None of the other tumor attributes showed significant association with  
295 survival (Supplementary Figure 7 A-F). In patients with oral cavity tumors, p16, HPV DNA and  
296 HPV RNA did not correlate with the either overall or disease-free survival of (Figure 4A,  
297 Supplementary Figure 8). HPV DNA status alone measured by any of the DNA-based assays alone  
298 or in combination did not correlate with survival (Supplementary Figure 8), except when measured

299 with ddPCR for overall survival (Supplementary Figure 8E,  $p=0.03$ ). We tested whether tumors  
300 with relatively high HPV DNA copy and/or HPV E6/E7 mRNA, is linked with survival. As shown  
301 in Supplementary Figure 9 A,B, we did not find any significant association with this group of  
302 tumors with both overall- ( $p = 0.45$ ) and disease-free ( $p = 0.68$ ) survival.

303  
304 Further, we investigated whether somatic mutations in significantly mutated genes in OSCC  
305 have a role to play in HPV DNA +ve tumors and patient survival. We looked at three genes (*TP53*,  
306 *CASP8*, and *RASA1*) shown to be significantly mutated in oral cavity tumors<sup>19,22,31</sup>. Ninety-five  
307 percent of the HPV +ve tumors in the group were wild-type for *TP53* and *CASP1* genes and 85% of  
308 the HPV +ve tumors for *RASA1* gene. (Supplementary Figure 10). We tested whether the mutation  
309 in any of the genes, alone or in combination in HPV –ve tumor group is linked with survival. As  
310 shown in Supplementary Figure 9 C,D, we did not find any significant association with this group  
311 of tumors with survival.

312  
313 *Linking methylation to HPV*

314 Supervised clustering of the first group of patients (a group defined as one with high-copy  
315 number HPV DNA and/or E6/E7 RNA) resulted in a list of 60 genes, out of which 9 (*FERMT3*,  
316 *GIT2*, *HK3*, *PRKCZ*, *ZCCHC8*, *IRF5*, *IFFO1*, *ARID3A*, *HOXA2*) were mapped to the HPV pathway  
317 (Figure 4B). Methylation of those genes is involved in the downstream control of the expression of  
318 different target genes. For example, *ZCCHC8* methylation is linked with the expression of RB1,  
319 *PRKCZ* methylation controls-state-change-of *DLG1*, methylation in *ARID3A*, *IRF5*, *IFFO1*, and  
320 *HOXA2* are connected with the expression of *TP53*, and *FERMT3*, *HK3*, and *GIT2* genes control  
321 the expression of *API (JUN)* (Figure 4B). All the genes, except for *HOXA2*, were significantly  
322 hypermethylated in the HPV +ve group of tumors compared to the HPV –ve group (Figure 4B).  
323 The linked four genes, obtained from the nine significantly methylated genes, were mapped to the  
324 pathways involving HPV E6 and E7 proteins (Figure 4C). To test significance, we performed  
325 unpaired t-tests between the two groups, group 1 that has relatively high-copy HPV DNA and/or  
326 HPV RNA and group 2 that were negative for both HPV DNA and HPV RNA. All of the eight

327 hypermethylated genes showed very significance ( $p < 0.00001$ ) and for *HOXA2* that was  
328 hypomethylated the  $p$ -value was 0.007 (Supplementary Table 2). However, when the patients were  
329 grouped based on HPV DNA positivity alone (irrespective of their copy number), most of these 9  
330 HPV-linked genes did not show significant association.

331

## 332 **DISCUSSION**

333 HPV plays a vital role in the prognosis of patients with oropharyngeal tumors<sup>32,33</sup>. Unlike  
334 oropharynx, HPV incidence and its role in disease prognosis in oral cavity tumors are not well  
335 established. Past results on HPV DNA incidence in oral cavity tumors were widely variable (from  
336 very low to very high) depending on the assay sensitivity, analyte and patient cohort used<sup>34</sup>. We  
337 performed literature survey and found that the rate of incidence, the role of HPV in disease  
338 outcome varies significantly in different groups (Supplementary Table 3). The accuracy of the HPV  
339 tests employed is, and HPV positivity needs to be answered to make treatment decisions in patients  
340 with head and neck tumors confidently<sup>35</sup>. There are fewer studies that used multiple analytes  
341 (protein, DNA, and RNA) and various molecular tests (IHC, PCR, qPCR and digital PCR) to  
342 establish HPV positivity in oral cavity tumors and that correlated HPV with tumor attributes  
343 (including somatic mutations and methylation) and survival. In the present study, we attempted to  
344 do this in 153 patients with oral cavity tumors.

345

346 While p16 expression, as measured by immunohistochemistry (IHC), is a commonly used  
347 proxy for HPV in HNSCC, its expression is not specific in HPV associated tumors<sup>33</sup>. Although a  
348 number of past studies correlated p16 expression with HPV<sup>36-38</sup>, p16 IHC has shortcomings,  
349 especially when relating its expression with patient survival. Limitations, such as variation in  
350 staining intensities<sup>39,40</sup>, nonspecific binding of antibodies and the lack of scoring and interpretive  
351 criteria used for p16 staining<sup>41</sup> make the method less reliable. In our study, although we found an  
352 unusually high number (51%) of tumor cells showing immunopositive staining, only a small  
353 percentage (18%) had both cytoplasmic+nuclear staining, an accurate reflection of HPV positivity  
354 as described earlier<sup>28,29</sup>. Unlike some of the previous studies<sup>24,42</sup>, we could not find any correlation

355 (either positive or negative) between p16 expression and survival (Figure 4). Like previous reports  
356 <sup>36,43</sup>, we found p16 expression not to be a useful surrogate marker for HPV in oral cavity tumors. A  
357 weak correlation between p16 IHC and HPV *in situ* hybridization (ISH) is reported in the past <sup>44</sup>.

358 Unlike antibody-based methods, nucleic acids-based methods detect HPV with high  
359 sensitivity and therefore used widely <sup>45</sup>. Meta-analysis of 5478 oral cavity tumors suggested the  
360 overall HPV DNA prevalence to be 24.2% with 11% tumors being positive for both HPV DNA and  
361 E6/E7 RNA <sup>46</sup>. India has one of the highest incidence rates of oral cavity cancers with a significant  
362 difference in the trend of incidence between oropharyngeal and oral cavity cancer <sup>47</sup>. Previously,  
363 PCR coupled with Mass Array is shown to provide high sensitivity of detection with a low amount  
364 of input genomic DNA <sup>48</sup>. From our results, we found 38% tumors to be positive, and 13% were  
365 negative in all three DNA-based assays (PCR, qPCR, and ddPCR) respectively. Overall, the  
366 prevalence (33-58%) of HPV DNA was dependent on the type of test used with PCR yielding the  
367 highest incidence over the more sensitive methods like qPCR and ddPCR assays (Table 2). This  
368 was possibly due to the use of consensus primers in PCR but not in qPCR and ddPCR, in addition  
369 to the type-specific ones, resulting in the detection of non-HPV16/18 subtypes. As expected, digital  
370 PCR, being the most-sensitive method out of the three DNA-based assays, resulted in more number  
371 of tumors being HPV16-DNA positive resulting in the detection of very low copy viral genomes in  
372 tumor samples. Based on several levels of evidence as noted below, we conclude that the presence  
373 of low copy HPV DNA alone may not be a reflection of functionally active HPV. First, in the  
374 tumors positive for HPV DNA, we found only a fraction (15%) with HPV E6/E7 RNA. Second,  
375 only 6% of tumors were positive for both the presence of HPV genome and E6/E7 RNA. Third,  
376 almost all the tumors with relatively high-copy HPV genome and/or HPV RNA had wild-type *TP53*  
377 and *CASP8* genes, which was not the case with tumors with the low-copy HPV DNA. Both *TP53*  
378 and *CASP8* are known to be wild-type primarily in HPV positive tumors <sup>19</sup>, and in our study, we  
379 also found this corresponds to the tumors with high-copy HPV genome and/or transcriptionally  
380 active genome only (Table 2). We believe that the high prevalence of HPV DNA in the tumor  
381 tissues might have been a result of highly sensitive assays used in our study and might suggest  
382 either the presence of passenger HPV genomes coming from adjacent normal cells, as earlier

383 reported<sup>48,49</sup> and/or might have been a reflection of inactive or passenger virus in oral cavity  
384 tumors. Although very few ( $n=3$ ), we cannot explain why some tumors in our study with HPV  
385 E6/E7 RNA did not show the presence of HPV DNA. It is possible that the genomic DNA for those  
386 tumors were degraded and therefore, could not serve as ideal templates for DNA-based assays. An  
387 additional factor could be the presence of inhibitors for DNA-based assays in those tumors.  
388 Although HPV RNA is considered to be gold standard analyte to test for HPV in tumors, RNA is a  
389 difficult analyte to handle and is more labile than DNA. Additionally, studying RNA in archival  
390 samples may pose an additional set of challenges.

391  
392 The fact that there were only two tumors, which were p16 positive and HPV RNA negative, a  
393 definitive conclusion on the lack of correlation between p16 and HPV RNA can't be made from our  
394 study. Similarly, there were two tumors, which were positive for HPV RNA and negative for p16.  
395 In HNSCC, p16 is often mutated/silenced resulting in its loss of expression. This could have led to  
396 the lack of p16 expression in those two tumors. We did not find any significant correlation between  
397 p16, HPV-DNA and/or HPV RNA and disease outcome (Figure 4A and Supplementary Figure 8).  
398 Even the tumors with relatively high-copy HPV genomes and/or E6/E7 RNA did not support the  
399 role of HPV in patient survival (Supplementary Figure 9 A, B). These aspects need further studies  
400 and analysis.

401  
402 There are several limitations of our study. Not all the tumors were assayed with all the  
403 analytes, making the sample number different for different methods. We could not perform  
404 additional survival analyses in the tumors that were HPV RNA positive given the small sample size.  
405 In our study, we did not perform HPV ISH, which could have provided additional information on  
406 p16 positivity and HPV prevalence. It is possible that HPV has a different mechanism of action in  
407 oral cavity tumors. Indirect support to linking high HPV genome copy number with HPV positivity  
408 in our study comes from the fact that we did not find significance in HPV-linked genes stratifying  
409 HPV +ve from HPV -ve group when HPV DNA irrespective of their copy number is taken into  
410 account in defining the HPV positivity (Figure 4B). It is possible that the presence of high-copy



411 HPV genome in those tumors does not correlate with the presence of the biologically active virus.

412 Further studies may help answer this question.

413

#### 414 **ACKNOWLEDGEMENTS**

415 Research presented in this article is funded by Department of Electronics and Information  
416 Technology, Government of India (Ref No: 18(4)/2010-E-Infra., 31-03-2010) and Department of  
417 IT, BT and ST, Government of Karnataka, India (Ref No: 3451-00-090-2-22). We thank Mr.  
418 Osama Mansour of Bio-Rad, India in helping us with ddPCR.

419

#### 420 **CONFLICT OF INTEREST**

421 None of the authors declare any conflicts of interest.

422

#### 423 **AUTHOR CONTRIBUTIONS**

424 Study design: Vinayak Palve and Binay Panda

425 Data analysis: Vinayak Palve, Neeraja M Krishnan and Binay Panda

426 Manuscript writing: Vinayak Palve and Binay Panda

427 Conducting experiments: Vinayak Palve, Jamir Bagwan, Udita Chandola, Manisha Pareek, Amritha  
428 Suresh, Gangotri Siddappa and Bonne L James

429 Collection of patient samples: Amritha Suresh, Vikram Kekatpure and Moni A Kuriakose

430 Overall study supervision: Binay Panda

431

#### 432 **ABBREVIATIONS**

433 HPV, human papillomavirus; HNSCC, head and neck squamous cell carcinoma; OSCC, oral cavity  
434 squamous cell carcinoma; IHC, immunohistochemistry; PCR, polymerase chain reaction; qPCR,  
435 quantitative polymerase chain reaction; ddPCR, droplet digital polymerase chain reaction

436

#### 437 **REFERENCES**

438



- 439 1. Ferlay J, Shin HR, Bray F, Forman D, Mathers C, Parkin DM. Estimates of worldwide  
440 burden of cancer in 2008: GLOBOCAN 2008. *International journal of cancer Journal*  
441 *international du cancer*. 2010;127:2893-2917.
- 442 2. Bhat SP, Bhat VS, Permi H, Shetty JK, Aroor R. Oral and oropharyngeal malignancy: A  
443 clinicopathological study. *Internet Journal of Pathology and Laboratory Medicine*. 2015;1.
- 444 3. Mishra A, Meherotra R. Head and neck cancer: global burden and regional trends in India.  
445 *Asian Pac J Cancer Prev*. 2014;15:537-550.
- 446 4. Nasman A, Attner P, Hammarstedt L, et al. Incidence of human papillomavirus (HPV)  
447 positive tonsillar carcinoma in Stockholm, Sweden: an epidemic of viral-induced  
448 carcinoma? *International journal of cancer Journal international du cancer*. 2009;125:362-  
449 366.
- 450 5. Walline HM, Komarek C, McHugh JB, et al. High-risk human papillomavirus detection in  
451 oropharyngeal, nasopharyngeal, and oral cavity cancers: comparison of multiple methods.  
452 *JAMA Otolaryngology-Head & Neck Surgery*. 2013;139:1320-1327.
- 453 6. Isayeva T, Li Y, Maswahu D, Brandwein-Gensler M. Human papillomavirus in non-  
454 oropharyngeal head and neck cancers: a systematic literature review. *Head Neck Pathol*.  
455 2012;6 Suppl 1:S104-120.
- 456 7. Ang KK, Harris J, Wheeler R, et al. Human papillomavirus and survival of patients with  
457 oropharyngeal cancer. *New England Journal of Medicine*. 2010;363:24-35.
- 458 8. Fakhry C, Westra WH, Li S, et al. Improved survival of patients with human  
459 papillomavirus-positive head and neck squamous cell carcinoma in a prospective clinical  
460 trial. *Journal of the National Cancer Institute*. 2008;100:261-269.
- 461 9. Fakhry C, Zhang Q, Nguyen-Tan PF, et al. Human papillomavirus and overall survival after  
462 progression of oropharyngeal squamous cell carcinoma. *J Clin Oncol*. 2014;32:3365-3373.
- 463 10. Lassen P, Eriksen JG, Hamilton-Dutoit S, Tramm T, Alsner J, Overgaard J. Effect of HPV-  
464 associated p16INK4A expression on response to radiotherapy and survival in squamous cell  
465 carcinoma of the head and neck. *J Clin Oncol*. 2009;27:1992-1998.
- 466 11. Rischin D, Young RJ, Fisher R, et al. Prognostic significance of p16INK4A and human  
467 papillomavirus in patients with oropharyngeal cancer treated on TROG 02.02 phase III trial.  
468 *J Clin Oncol*. 2010;28:4142-4148.
- 469 12. Cattani P, Siddu A, D'Onghia S, et al. RNA (E6 and E7) assays versus DNA (E6 and E7)  
470 assays for risk evaluation for women infected with human papillomavirus. *J Clin Microbiol*.  
471 2009;47:2136-2141.
- 472 13. Huang C-G, Lee L-A, Tsao K-C, et al. Human papillomavirus 16/18 E7 viral loads predict  
473 distant metastasis in oral cavity squamous cell carcinoma. *Journal of Clinical Virology*.  
474 2014;61:230-236.
- 475 14. Balaram P, Nalinakumari KR, Abraham E, et al. Human papillomaviruses in 91 oral cancers  
476 from Indian betel quid chewers--high prevalence and multiplicity of infections.  
477 *International journal of cancer Journal international du cancer*. 1995;61:450-454.
- 478 15. D'Costa J, Saranath D, Dedhia P, Sanghvi V, Mehta AR. Detection of HPV-16 genome in  
479 human oral cancers and potentially malignant lesions from India. *Oral oncology*.  
480 1998;34:413-420.
- 481 16. zur Hausen H. Papillomaviruses and cancer: from basic studies to clinical application. *Nat*  
482 *Rev Cancer*. 2002;2:342-350.
- 483 17. Lu DW, El-Mofty SK, Wang HL. Expression of p16, Rb, and p53 proteins in squamous cell  
484 carcinomas of the anorectal region harboring human papillomavirus DNA. *Mod Pathol*.  
485 2003;16:692-699.
- 486 18. Wang H, Sun R, Lin H, Hu WH. P16INK4A as a surrogate biomarker for human  
487 papillomavirus-associated oropharyngeal carcinoma: consideration of some aspects. *Cancer*  
488 *Sci*. 2013;104:1553-1559.
- 489 19. Cancer Genome Atlas N. Comprehensive genomic characterization of head and neck  
490 squamous cell carcinomas. *Nature*. 2015;517:576-582.
- 491 20. Lechner M, Frampton GM, Fenton T, et al. Targeted next-generation sequencing of head  
492 and neck squamous cell carcinoma identifies novel genetic alterations in HPV+ and HPV-  
493 tumors. *Genome Med*. 2013;5:49.

- 494 **21.** Seiwert TY, Zuo Z, Keck MK, et al. Integrative and comparative genomic analysis of HPV-  
495 positive and HPV-negative head and neck squamous cell carcinomas. *Clin Cancer Res.*  
496 2015;21:632-641.
- 497 **22.** Krishnan N, Gupta S, Palve V, et al. Integrated analysis of oral tongue squamous cell  
498 carcinoma identifies key variants and pathways linked to risk habits, HPV, clinical  
499 parameters and tumor recurrence. *F1000Res.* 2015;4:1215.
- 500 **23.** Brenner JC, Graham MP, Kumar B, et al. Genotyping of 73 UM-SCC head and neck  
501 squamous cell carcinoma cell lines. *Head & neck.* 2010;32:417-426.
- 502 **24.** Auw-Haedrich C, Martin G, Spelsberg H, et al. Expression of p16 in conjunctival  
503 intraepithelial neoplasia does not correlate with HPV-infection. *The open ophthalmology*  
504 *journal.* 2008;2:48.
- 505 **25.** Romero-Pastrana F. Detection and typing of human papilloma virus by multiplex PCR with  
506 type-specific primers. *ISRN microbiology.* 2012;2012.
- 507 **26.** Schmittgen TD, Livak KJ. Analyzing real-time PCR data by the comparative CT method.  
508 *Nature protocols.* 2008;3:1101-1108.
- 509 **27.** Krishnan NM, Dhas K, Nair J, et al. A Minimal DNA Methylation Signature in Oral Tongue  
510 Squamous Cell Carcinoma Links Altered Methylation with Tumor Attributes. *Mol Cancer*  
511 *Res.* 2016;14:805-819.
- 512 **28.** Chen ZW, Weinreb I, Kamel-Reid S, Perez-Ordóñez B. Equivocal p16 immunostaining in  
513 squamous cell carcinoma of the head and neck: staining patterns are suggestive of HPV  
514 status. *Head Neck Pathol.* 2012;6:422-429.
- 515 **29.** Lewis JS, Jr., Chernock RD, Ma XJ, et al. Partial p16 staining in oropharyngeal squamous  
516 cell carcinoma: extent and pattern correlate with human papillomavirus RNA status. *Mod*  
517 *Pathol.* 2012;25:1212-1220.
- 518 **30.** Biron VL, Kostiuk M, Isaac A, et al. Detection of human papillomavirus type 16 in  
519 oropharyngeal squamous cell carcinoma using droplet digital polymerase chain reaction.  
520 *Cancer.* 2016;122:1544-1551.
- 521 **31.** India Project Team of the International Cancer Genome C. Mutational landscape of gingivo-  
522 buccal oral squamous cell carcinoma reveals new recurrently-mutated genes and molecular  
523 subgroups. *Nature communications.* 2013;4:2873.
- 524 **32.** Maxwell JH, Grandis JR, Ferris RL. HPV-Associated Head and Neck Cancer: Unique  
525 Features of Epidemiology and Clinical Management. *Annu Rev Med.* 2016;67:91-101.
- 526 **33.** Vokes EE, Agrawal N, Seiwert TY. HPV-Associated Head and Neck Cancer. *Journal of the*  
527 *National Cancer Institute.* 2015;107:djv344.
- 528 **34.** Bruni L, Barrionuevo-Rosas L, Serrano B, et al. Human papillomavirus and related diseases  
529 report. *L'Hospitalet de Llobregat: ICO Information Centre on HPV and Cancer.* 2014.
- 530 **35.** Seiwert T. Accurate HPV testing: a requirement for precision medicine for head and neck  
531 cancer. *Annals of oncology : official journal of the European Society for Medical Oncology /*  
532 *ESMO.* 2013;24:2711-2713.
- 533 **36.** Chung CH, Zhang Q, Kong CS, et al. p16 protein expression and human papillomavirus  
534 status as prognostic biomarkers of nonoropharyngeal head and neck squamous cell  
535 carcinoma. *Journal of Clinical Oncology.* 2014;JCO. 2013.2054. 5228.
- 536 **37.** Stephen JK, Divine G, Chen KM, Chitale D, Havard S, Worsham MJ. Significance of p16  
537 in site-specific HPV positive and HPV negative head and neck squamous cell carcinoma.  
538 *Cancer and clinical oncology.* 2013;2:51.
- 539 **38.** Gröbe A, Hanken H, Kluwe L, et al. Immunohistochemical analysis of p16 expression, HPV  
540 infection and its prognostic utility in oral squamous cell carcinoma. *Journal of Oral*  
541 *Pathology & Medicine.* 2013;42:676-681.
- 542 **39.** Larsen CG, Gyldenløve M, Jensen D, et al. Correlation between human papillomavirus and  
543 p16 overexpression in oropharyngeal tumours: a systematic review. *British journal of*  
544 *cancer.* 2014;110:1587-1594.
- 545 **40.** Seiwert TY. Ties That Bind: p16 As a Prognostic Biomarker and the Need for High-  
546 Accuracy Human Papillomavirus Testing. *Journal of Clinical Oncology.* 2014;JCO.  
547 2014.2057. 9268.

- 548 **41.** El-Naggar AK, Westra WH. p16 expression as a surrogate marker for HPV-related  
549 oropharyngeal carcinoma: A guide for interpretative relevance and consistency. *Head &*  
550 *neck*. 2012;34:459-461.
- 551 **42.** Alexander RE, Hu Y, Kum JB, et al. p16 expression is not associated with human  
552 papillomavirus in urinary bladder squamous cell carcinoma. *Modern Pathology*.  
553 2012;25:1526-1533.
- 554 **43.** Lingen MW, Xiao W, Schmitt A, et al. Low etiologic fraction for high-risk human  
555 papillomavirus in oral cavity squamous cell carcinomas. *Oral oncology*. 2013;49:1-8.
- 556 **44.** Chung CH, Zhang Q, Kong CS, et al. p16 protein expression and human papillomavirus  
557 status as prognostic biomarkers of nonoropharyngeal head and neck squamous cell  
558 carcinoma. *J Clin Oncol*. 2014;32:3930-3938.
- 559 **45.** Gibson JS. Nucleic acid-based assays for the detection of high-risk human papillomavirus:  
560 A technical review. *Cancer cytopathology*. 2014;122:639-645.
- 561 **46.** Ndiaye C, Mena M, Alemany L, et al. HPV DNA, E6/E7 mRNA, and p16INK4a detection  
562 in head and neck cancers: a systematic review and meta-analysis. *Lancet Oncol*.  
563 2014;15:1319-1331.
- 564 **47.** Chaturvedi AK, Anderson WF, Lortet-Tieulent J, et al. Worldwide trends in incidence rates  
565 for oral cavity and oropharyngeal cancers. *J Clin Oncol*. 2013;31:4550-4559.
- 566 **48.** Terai M, Hashimoto K, Yoda K, Sata T. High prevalence of human papillomaviruses in the  
567 normal oral cavity of adults. *Oral Microbiol Immunol*. 1999;14:201-205.
- 568 **49.** Gillison ML, Broutian T, Pickard RK, et al. Prevalence of oral HPV infection in the United  
569 States, 2009-2010. *JAMA*. 2012;307:693-703.
- 570  
571  
572  
573  
574  
575  
576  
577  
578  
579  
580  
581  
582  
583  
584  
585  
586  
587  
588  
589  
590  
591  
592  
593  
594  
595  
596  
597  
598  
599  
600  
601  
602  
603  
604

605 **Table 1:** Patient details and characteristics of tumor tissues used in the study.  
606

| Characteristics                   |                            | Number |
|-----------------------------------|----------------------------|--------|
| Primary site                      |                            |        |
|                                   | Buccal mucosa              | 41     |
|                                   | Oral tongue                | 112    |
| Gender                            |                            |        |
|                                   | Male                       | 114    |
|                                   | Female                     | 39     |
| Age                               |                            |        |
|                                   | >40                        | 112    |
|                                   | <=40                       | 40     |
|                                   | NA                         | 1      |
| Risk habits                       |                            |        |
|                                   | Alcohol                    | 4      |
|                                   | Chewing                    | 43     |
|                                   | Smoking                    | 6      |
|                                   | Alcohol+ Chewing           | 14     |
|                                   | Smoking + Alcohol          | 16     |
|                                   | Smoking + Chewing          | 9      |
|                                   | Smoking + Alcohol+ Chewing | 10     |
|                                   | No habits                  | 44     |
|                                   | NA                         | 7      |
| Tumor classification/stage        |                            |        |
|                                   | I+II                       | 43     |
|                                   | III+IV                     | 109    |
|                                   | NA                         | 1      |
| Differentiation                   |                            |        |
|                                   | Well                       | 48     |
|                                   | Moderate                   | 73     |
|                                   | Poor                       | 20     |
|                                   | NA                         | 12     |
| Abbreviations: NA = Not Available |                            |        |

608 **Table 2.** Summary of HPV assays in oral cavity tumors. p16 was measured by the presence of  
 609 immunopositive cells with both nuclear and cytoplasmic staining in IHC, PCR results indicate  
 610 presence of any HPV subtype with consensus primers or HPV16/18 type specific primers, qPCR  
 611 and ddPCR results indicate Taqman assay results with primers and probes for HPV 16/18 and  
 612 HPV16 respectively and HPV RNA results indicate presence of E6 and/or E7 mRNA for  
 613 HPV16/HPV18.

614  
 615

| Detection    | Method            | % Positivity  |               |                        |
|--------------|-------------------|---------------|---------------|------------------------|
|              |                   | Oral tongue   | Buccal mucosa | Together (Oral cavity) |
| p16 IHC      | p16               | 18% (10/55)   | NA            | 18% (10/55)            |
| DNA based    | PCR               | 59% (39/66)   | 50% (2/4)     | 58% (41/70)            |
|              | qPCR              | 44% (34/78)   | 3.6% (1/28)   | 33% (35/106)           |
|              | ddPCR             | 55% (52/95)   | 17% (7/41)    | 43% (59/136)           |
| RNA based    | qPCR              | 17% (5/30)    | 9% (1/11)     | 15% (6/41)             |
| Combinations | PCR + qPCR        | 38% (23/60)   |               |                        |
|              | PCR + ddPCR       | 48.3%(29/60)  |               |                        |
|              | qPCR + ddPCR      | 27.2% (27/99) |               |                        |
|              | PCR +qPCR + ddPCR | 37.7% (20/53) |               |                        |
|              | p16 + 3/3 Methods | 5.5% (2/36)   |               |                        |
|              | RNA + DNA         | 6% (1/17)     |               |                        |

616

617

618 **Figure legends**

619 **Figure 1:** HPV genome organization and locations of different primer/probes used in the study to  
620 detect HPV DNA (either consensus or type specific) and RNA. The numbers represent the  
621 corresponding nucleotide number in the HPV genome.

622

623 **Figure 2:** p16 and HPV DNA in OSCC. Representative images of immunohistochemical staining  
624 of p16 in positive, negative OSCC tissue sections and cervical tissue as positive control (A), the  
625 relative PCR amplification efficiency and sensitivity of consensus /type specific primers for  
626 detection of HPV using HPV16 or HPV18 individual positive control cell lines (UMSCC-47 and  
627 Hep2 ) (B) and representative HPV DNA PCR in oral cavity tumors with both consensus and type-  
628 specific primers (C).

629

630 **Figure 3:** Detection of HPV DNA and RNA. HPV16/18 assays using qPCR (A I-VI) and digital  
631 PCR (B I-III) in OSCCS is shown. Standard curves were obtained using cloned HPV16/18 plasmids  
632 (A-I,IV, B -I) and data was subsequently obtained using the positive (UM-SCC-47 and Hep2) and  
633 negative (UPCI:SCC29B & UPCI:SCC40) cell line DNA (A-II,V, B-II) to count HPV DNA in oral  
634 cavity tumors (A-III,VI, B-III). Figure 3C indicates HPV16 (top panel) and HPV18 (bottom panel)  
635 E6/E7 mRNA expression in tumors using qPCR..

636

637 **Figure 4:** Kaplan Meier survival plots. Survival plots linking tumors with various attributes like  
638 grade, stage, p16 IHC, HPV DNA and HPV RNA (A) is shown. Figure 4B and 4C depict clustering  
639 of nine methylated genes stratifying HPV positive from negative group of tumors (B) and HPV-  
640 associated pathways (C) in HPV positive tumors.

641

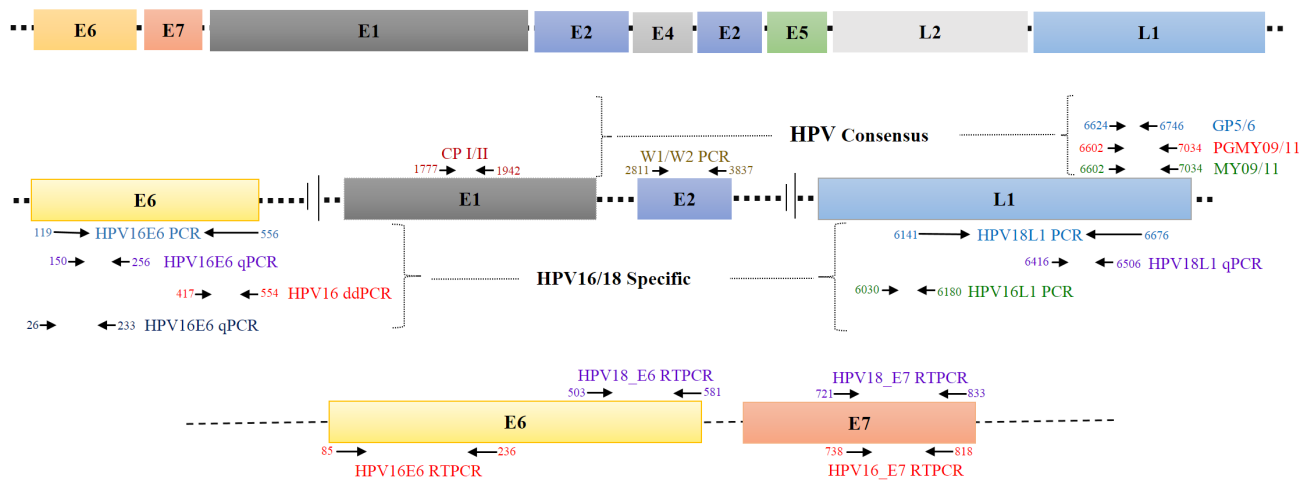

**Figure 1**



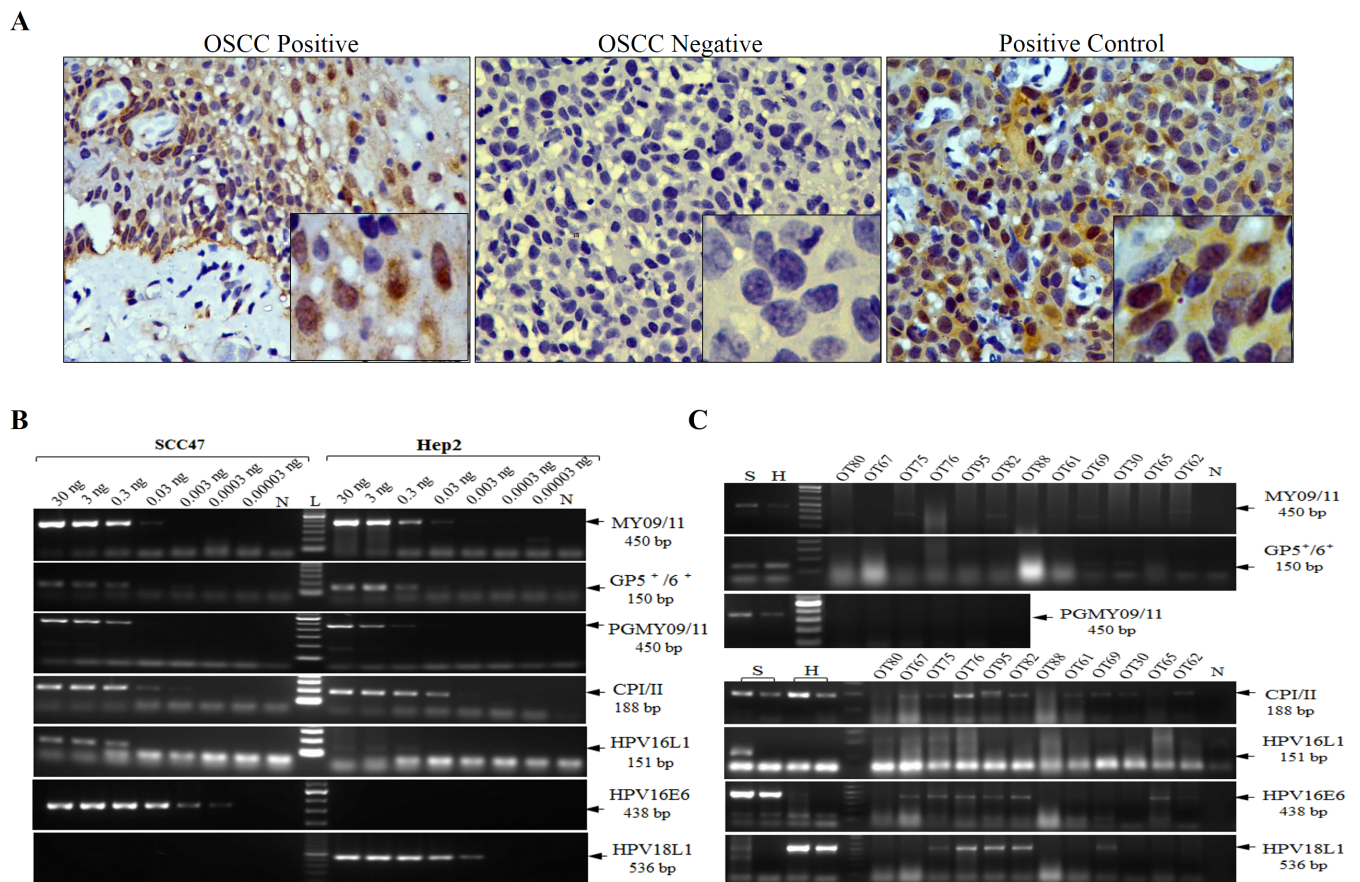

**Figure 2**



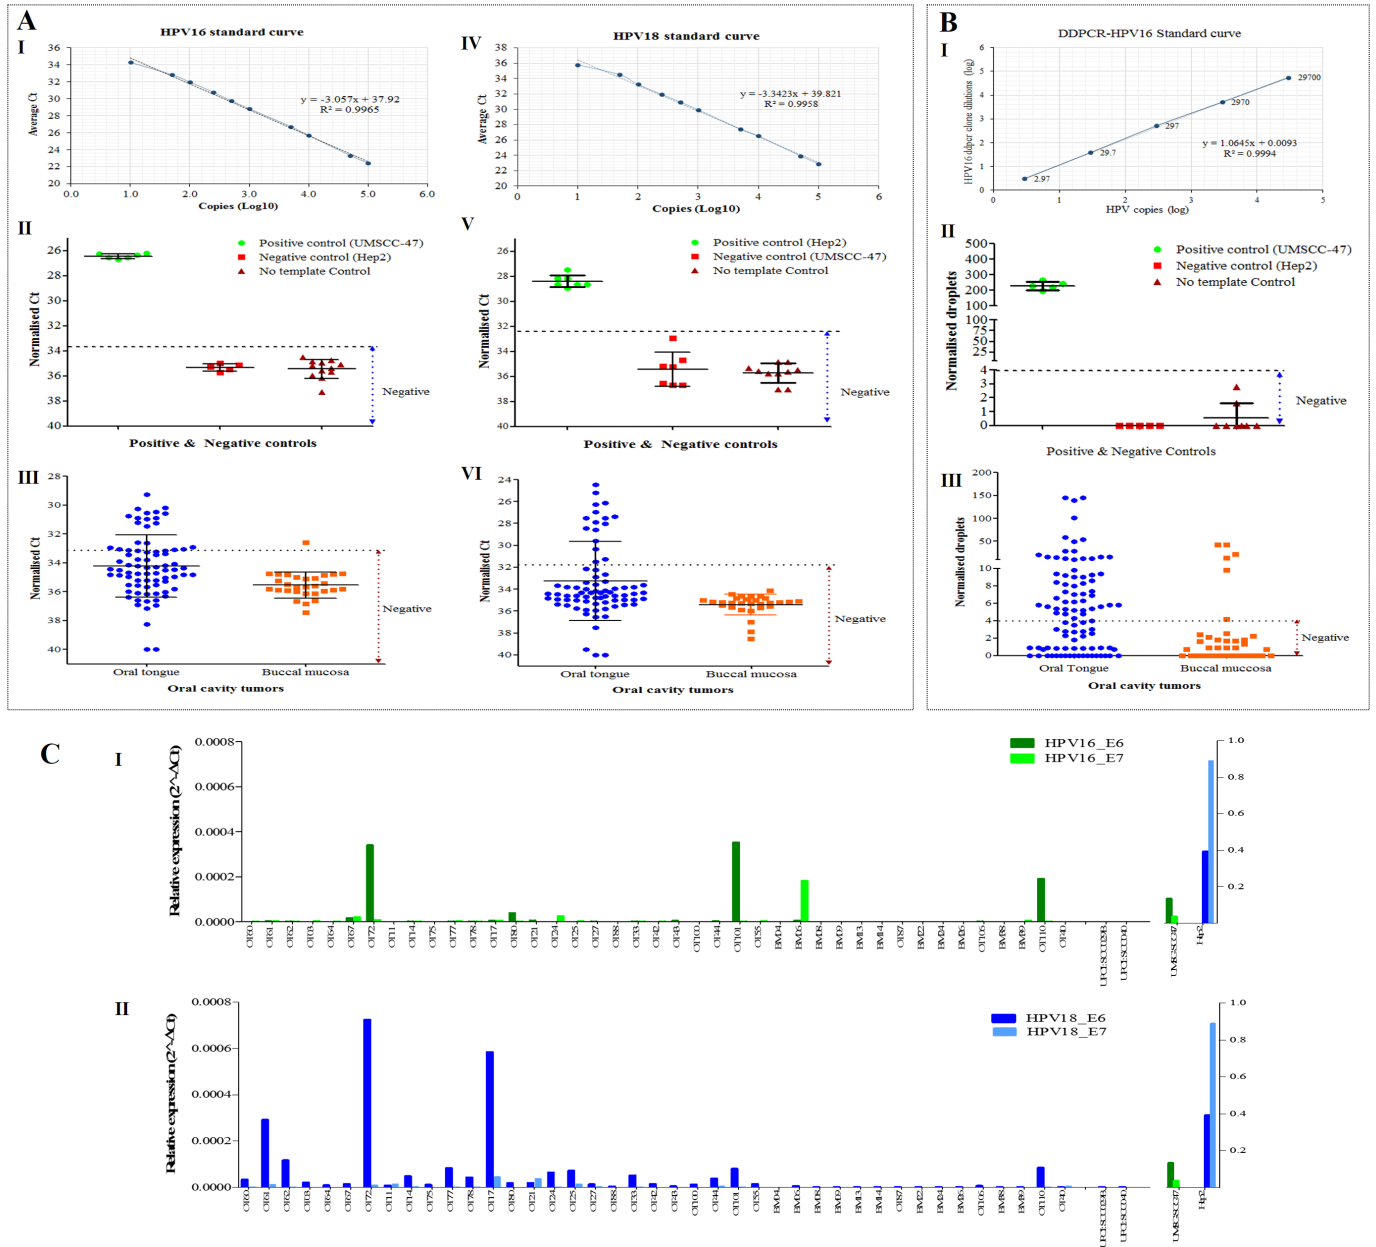

**Figure 3**

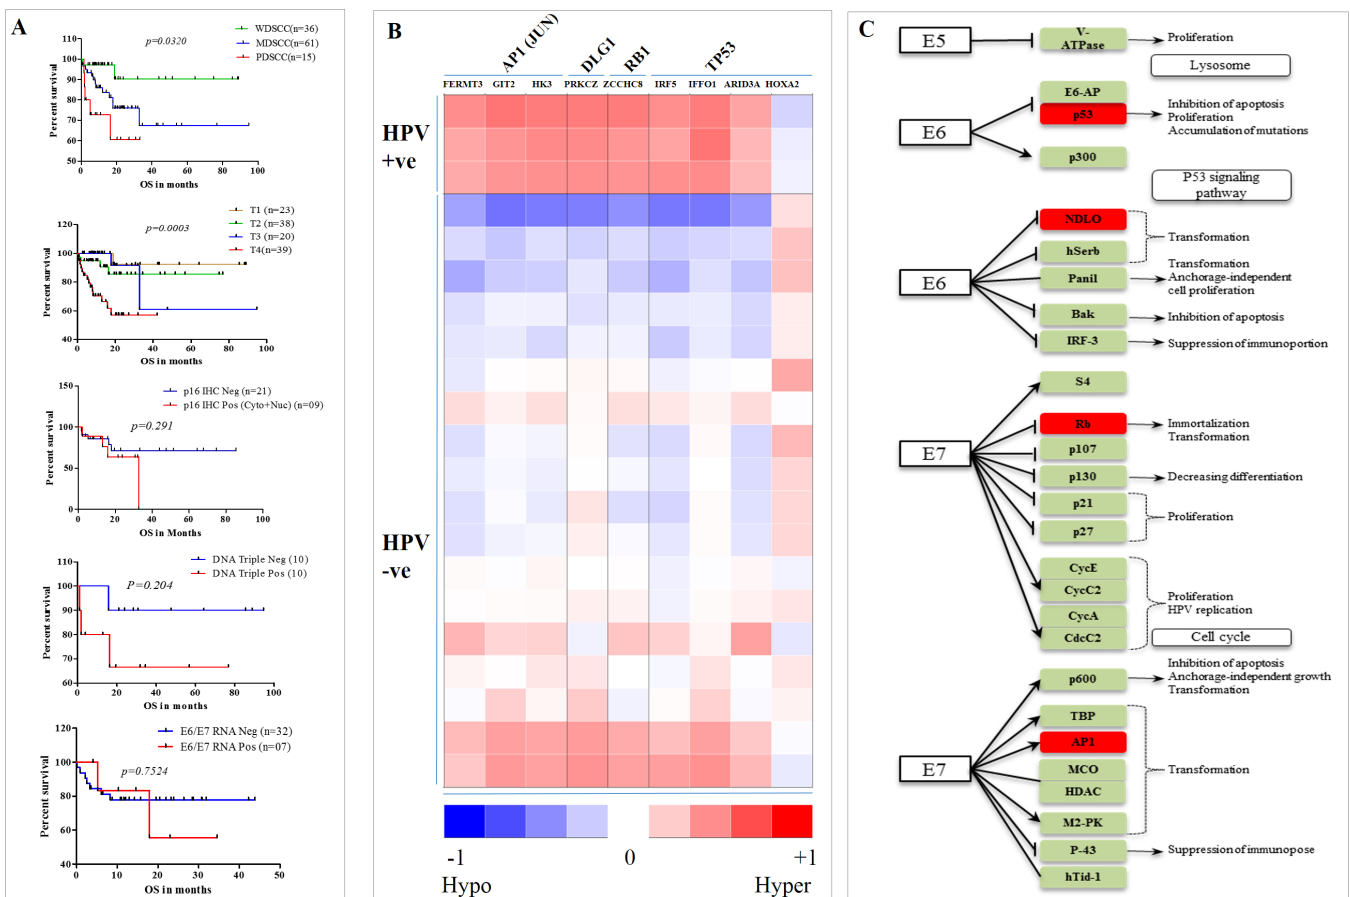

**Figure 4**
